# Supplementary material
Source: ML conference proceedings conference paper supplement (https://openaccess.thecvf.com/content/ICCV2023/html/Fu_UnitedHuman_Harnessing_Multi-Source_ICCV_2023_paper.html)
Supplement: Supplementary file 3 [file Fu_UnitedHuman_Harnessing_Multi-Source_ICCV_2023_supplemental.zip]

Archive with 4 entries (4 files):
- 01580-supp.pdf
- __MACOSX/._01580-supp.pdf
- unitedhuman-iccv_FINAL.mp4
- __MACOSX/._unitedhuman-iccv_FINAL.mp4
